# Supplementary material
Source: publisher figshare collection journal article supplement (https://brill.figshare.com/ndownloader/files/30611004)
Supplement: Supplementary file 1 [file 30611004]

**Appendix C**

**Statistical analyses**

**Table C1.**

Comparison between groups in the CBCL’s scales and subscales

|  | Anxiety | Isolation | Somatic complaints | Social Problems | Thought problems | Attention problems | Disruptive behavior | Aggressive behavior | Other problems | Internalising | Externalising |
| --- | --- | --- | --- | --- | --- | --- | --- | --- | --- | --- | --- |
| Mann-Whitney *U* | 583.500 | 561.000 | 710.500 | 506.000 | 698.500 | 552.500 | 494.000 | 492.500 | 823.000 | 630.500 | 469.000 |
| *Z* | -2.669 | -2.891 | -1.570 | -3.368 | -1.658 | -2.952 | -3.365 | -3.476 | -.514 | -2.240 | -3.566 |
| Sig (2-tailed) | 0.008* | 0.004* | 0.116 | 0.001* | 0.097 | 0.003* | 0.001* | 0.001* | 0.608 | 0.025* | 0.000* |

**Table C2.**

Pearson correlations between the ethogram categories and the CBCL scales and subscales

|  | | Anxiety | Isolation | Somatic complaints | Social Problems | Thought problems | Attention problems | Disruptive behavior | Aggressive behavior | Other problems | Internalising | Externalising |
| --- | --- | --- | --- | --- | --- | --- | --- | --- | --- | --- | --- | --- |
| Externalising of frustration | Pearson's correlation | -0.059 | 0.235 | -0.150 | 0.052 | -0.060 | 0.019 | 0.014 | 0.058 | -0.017 | 0.006 | 0.052 |
| Sig (2-tailed) | 0.592 | 0.032** | 0.173 | 0.640 | 0.589 | 0.863 | 0.899 | 0.603 | 0.878 | 0.954 | 0.642 |
| Self-support | Pearson's correlation | 0.027 | -0.005 | -0.155 | 0.070 | -0.015 | -0.043 | 0.060 | 0.062 | -0.158 | -0.035 | 0.066 |
| Sig (2-tailed) | 0.805 | 0.967 | 0.159 | 0.530 | 0.892 | 0.695 | 0.590 | 0.575 | 0.151 | 0.749 | 0.551 |
| Distraction | Pearson's correlation | -0.130 | -0.192 | -0.068 | 0.094 | 0.057 | -0.008 | 0.132 | 0.232 | 0.056 | -0.167 | 0.214 |
| Sig (2-tailed) | 0.238 | 0.080 | 0.537 | 0.396 | 0.606 | 0.944 | 0.233 | 0.034** | 0.612 | 0.128 | 0.052** |
| Fatigue | Pearson's correlation | 0.022 | -0.060 | 0.038 | 0.164 | 0.134 | 0.094 | 0.029 | 0.258 | 0.060 | 0.002 | 0.191 |
| Sig (2-tailed) | 0.845 | 0.589 | 0.734 | 0.135 | 0.223 | 0.397 | 0.792 | 0.018** | 0.589 | 0.986 | 0.084 |
| Hyperactivation | Pearson's correlation | 0.038 | 0.067 | -0.136 | -0.073 | -0.039 | 0.012 | 0.168 | 0.095 | -0.114 | 0.004 | 0.125 |
| Sig (2-tailed) | 0.728 | 0.544 | 0.216 | 0.507 | 0.722 | 0.913 | 0.129 | 0.389 | 0.302 | 0.974 | 0.259 |

** *p*<0.05.

**Table C3.**

Pearson correlations between the ethogram non-verbal behaviours and the CBCL scales and subscales

|  | | Anxiety | Isolation | Somatic complaints | Social Problems | Thought problems | Attention problems | Disruptive behavior | Aggressive behavior | Other problems | Internalising domain | Externalising domain |
| --- | --- | --- | --- | --- | --- | --- | --- | --- | --- | --- | --- | --- |
| Anchoring | Pearson´s correlation | 0.103 | 0.035 | 0.077 | 0.230 | 0.154 | 0.111 | 0.242 | 0.423 | 0.215 | 0.096 | 0.394 |
| Sig (2-tailed) | 0.349 | 0.753 | 0.488 | 0.035** | 0.162 | 0.314 | 0.028** | 0.000** | 0.050** | 0.384 | 0.000** |
| Leaning | Pearson´s correlation | 0.130 | 0.216 | 0.006 | 0.118 | 0.079 | 0.109 | 0.046 | 0.104 | -0.057 | 0.157 | 0.086 |
| Sig (2-tailed) | 0.240 | 0.048** | 0.956 | 0.287 | 0.473 | 0.322 | 0.677 | 0.345 | 0.606 | 0.155 | 0.438 |
| Holding head | Pearson´s correlation | 0.000 | 0.038 | -0.058 | -0.003 | -0.091 | -0.050 | 0.107 | 0.023 | -0.015 | -0.004 | 0.057 |
| Sig (2-tailed) | 0.998 | 0.734 | 0.601 | 0.981 | 0.410 | 0.651 | 0.334 | 0.837 | 0.896 | 0.968 | 0.607 |
| Self-touching | Pearson´s correlation | -0.052 | -0.096 | -0.213 | -0.058 | -0.080 | -0.119 | -0.102 | -0.172 | -0.288 | -0.133 | -0.160 |
| Sig (2-tailed) | 0.640 | 0.384 | 0.052 | 0.600 | 0.468 | 0.279 | 0.358 | 0.119 | 0.008** | 0.228 | 0.148 |
| Clapping | Pearson´s correlation | 0.191 | 0.053 | -0.122 | 0.130 | 0.244 | 0.086 | 0.097 | 0.062 | 0.004 | 0.090 | 0.080 |
| Sig (2-tailed) | 0.082 | 0.630 | 0.268 | 0.240 | 0.026** | 0.439 | 0.382 | 0.577 | 0.973 | 0.418 | 0.470 |
| Singing/dancing | Pearson´s correlation | -0.061 | -0.048 | -0.143 | 0.101 | -0.021 | 0.039 | -0.072 | 0.093 | -0.052 | -0.098 | 0.042 |
| Sig (2-tailed) | 0.580 | 0.663 | 0.194 | 0.358 | 0.847 | 0.722 | 0.516 | 0.399 | 0.640 | 0.374 | 0.705 |
| Whistling | Pearson´s correlation | -0.070 | -0.082 | 0.013 | 0.082 | 0.017 | 0.172 | 0.009 | 0.032 | 0.089 | -0.066 | 0.026 |
| Sig (2-tailed) | 0.528 | 0.456 | 0.907 | 0.458 | 0.877 | 0.117 | 0.936 | 0.775 | 0.422 | 0.548 | 0.818 |
| Gesturing | Pearson´s correlation | -0.007 | -0.125 | -0.053 | 0.218 | 0.270 | 0.151 | 0.326 | 0.382 | 0.171 | -0.067 | 0.394 |
| Sig (2-tailed) | 0.953 | 0.259 | 0.633 | 0.046** | 0.013** | 0.170 | 0.003** | 0.000** | 0.121 | 0.544 | 0.000** |
| Manipulating objects | Pearson´s correlation | 0.048 | 0.022 | -0.053 | 0.258 | 0.080 | 0.252 | 0.255 | 0.207 | 0.138 | 0.019 | 0.243 |
| Sig (2-tailed) | 0.663 | 0.843 | 0.630 | 0.018** | 0.469 | 0.021** | 0.020** | 0.059 | 0.209 | 0.866 | 0.027** |
| Reorienting | Pearson´s correlation | -0.158 | -0.193 | -0.017 | -0.029 | -0.021 | -0.123 | 0.040 | 0.113 | 0.000 | -0.168 | 0.095 |
| Sig (2-tailed) | 0.151 | 0.079 | 0.875 | 0.790 | 0.850 | 0.266 | 0.723 | 0.307 | 0.999 | 0.128 | 0.395 |
| Withdrawing | Pearson´s correlation | 0.149 | 0.059 | -0.071 | 0.125 | 0.144 | 0.139 | 0.073 | 0.000 | 0.085 | 0.000 | 0.107 |
| Sig (2-tailed) | 0.000 | 0.591 | 0.000 | 0.258 | 0.000 | 0.207 | 0.000 | 0.310 | 0.000 | 0.446 | 0.000 |
| Sighing | Pearson´s correlation | 0.000 | -0.007 | 0.000 | -0.150 | 0.000 | -0.076 | 0.000 | -0.122 | 0.000 | -0.030 | 0.000 |
| Sig (2-tailed) | 0.000 | 0.949 | 0.000 | 0.173 | 0.000 | 0.489 | 0.000 | 0.267 | 0.000 | 0.785 | 0.000 |
| Yawning | Pearson´s correlation | 0.000 | 0.073 | 0.000 | -0.014 | 0.000 | 0.161 | 0.000 | 0.088 | 0.000 | 0.080 | 0.000 |
| Sig (2-tailed) | 0.000 | 0.509 | 0.000 | 0.899 | 0.000 | 0.144 | 0.000 | 0.425 | 0.000 | 0.471 | 0.000 |
| Stretching | Pearson´s correlation | 0.000 | 0.031 | 0.000 | 0.125 | 0.000 | 0.022 | 0.000 | 0.226 | 0.000 | 0.026 | 0.000 |
| Sig (2-tailed) | 0.000 | 0.778 | 0.000 | 0.256 | 0.000 | 0.843 | 0.000** | 0.039** | 0.000 | 0.815 | 0.000** |
| Re-accommodating | Pearson´s correlation | 0.000 | -0.090 | 0.000 | 0.161 | 0.000 | 0.070 | 0.000 | 0.217 | 0.000 | -0.021 | 0.000 |
| Sig (2-tailed) | 0.000 | 0.418 | 0.000 | 0.144 | 0.000 | 0.527 | 0.000 | 0.047** | 0.000 | 0.851 | 0.000 |
| Moving head | Pearson´s correlation | 0.000 | 0.163 | 0.000 | -0.023 | 0.000 | 0.066 | 0.000 | 0.153 | 0.000 | 0.141 | 0.000 |
| Sig (2-tailed) | 0.000 | 0.138 | 0.000 | 0.835 | 0.000 | 0.553 | 0.000 | 0.164 | 0.000 | 0.199 | 0.000 |
| Rocking | Pearson´s correlation | 0.000 | 0.052 | 0.000 | 0.068 | 0.000 | 0.098 | 0.000 | -0.026 | 0.000 | 0.027 | 0.000 |
| Sig (2-tailed) | 0.000 | 0.637 | 0.000 | 0.537 | 0.000 | 0.375 | 0.000 | 0.818 | 0.000 | 0.810 | 0.000 |
| Nibbling | Pearson´s correlation | 0.000 | 0.252 | 0.000 | 0.060 | 0.000 | -0.022 | 0.000 | 0.019 | 0.000 | 0.117 | 0.000 |
| Sig (2-tailed) | 0.000 | 0.021** | 0.000 | 0.587 | 0.000 | 0.842 | 0.000 | 0.867 | 0.000 | 0.288 | 0.000 |
| Moving hands or fingers | Pearson´s correlation | 0.000 | -0.129 | 0.000 | -0.155 | 0.000 | -0.155 | 0.000 | -0.135 | 0.000 | -0.196 | 0.000 |
| Sig (2-tailed) | 0.000 | 0.242 | 0.000 | 0.160 | 0.000 | 0.160 | 0.000 | 0.221 | 0.000 | 0.073 | 0.000 |
| Moving legs | Pearson´s correlation | 0.000 | 0.041 | 0.000 | -0.053 | 0.000 | 0.071 | 0.000 | 0.160 | 0.000 | 0.039 | 0.000 |
| Sig (2-tailed) | 0.000 | 0.708 | 0.000 | 0.633 | 0.000 | 0.519 | 0.000 | 0.146 | 0.000 | 0.724 | 0.000 |
| Standing up | Pearson´s correlation | 0.000 | -0.047 | 0.000 | 0.017 | 0.000 | -0.008 | 0.000 | 0.209 | 0.000 | -0.147 | 0.000 |
| Sig (2-tailed) | 0.000 | 0.669 | 0.000 | 0.876 | 0.000 | 0.942 | 0.000 | 0.056 | 0.000 | 0.181 | 0.000 |
| Hitting pieces | Pearson´s correlation | 0.000 | 0.149 | 0.000 | 0.049 | 0.000 | 0.010 | 0.000 | 0.032 | 0.000 | 0.032 | 0.000 |
| Sig (2-tailed) | 0.000 | 0.175 | 0.000 | 0.659 | 0.000 | 0.928 | 0.000 | 0.774 | 0.000 | 0.770 | 0.000 |
| Hitting surface | Pearson´s correlation | 0.000 | 0.216 | 0.000 | 0.259 | 0.000 | 0.105 | 0.000 | 0.034 | 0.000 | 0.154 | 0.000 |
| Sig (2-tailed) | 0.000 | 0.049** | 0.000 | 0.018** | 0.000 | 0.341 | 0.000 | 0.759 | 0.000 | 0.161 | 0.000 |
| Pulling clothes | Pearson´s correlation | 0.000 | 0.182 | 0.000 | 0.070 | 0.000 | 0.044 | 0.000 | 0.175 | 0.000 | 0.115 | 0.000 |
| Sig (2-tailed) | 0.000 | 0.097 | 0.000 | 0.528 | 0.000** | 0.690 | 0.000 | 0.111 | 0.000 | 0.297 | 0.000 |
| Swiping | Pearson´s correlation | 0.000 | 0.039 | 0.000 | -0.127 | 0.000 | -0.027 | 0.000 | -0.125 | 0.000 | -0.093 | 0.000 |
| Sig (2-tailed) | 0.000 | 0.724 | 0.000 | 0.249 | 0.000 | 0.808 | 0.000 | 0.257 | 0.000 | 0.401 | 0.000 |
| Throwing pieces | Pearson´s correlation | 0.000 | 0.299 | 0.000 | -0.042 | 0.000 | -0.051 | 0.000 | 0.057 | 0.000 | 0.025 | 0.000 |
| Sig (2-tailed) | 0.000 | 0.006** | 0.000 | 0.705 | 0.000 | 0.647 | 0.000 | 0.606 | 0.000 | 0.824 | 0.000 |
| Self-hitting | Pearson´s correlation | 0.000 | 0.052 | 0.000 | 0.013 | 0.000 | -0.032 | 0.000 | -0.069 | 0.000 | -0.035 | 0.000 |
| Sig (2-tailed) | 0.000 | 0.641 | 0.000 | 0.905 | 0.000 | 0.776 | 0.000 | 0.532 | 0.000 | 0.753 | 0.000 |
| Destroying work | Pearson´s correlation | 0.000 | -0.028 | 0.000 | 0.102 | 0.000 | 0.117 | 0.000 | 0.134 | 0.000 | -0.070 | 0.000 |
| Sig (2-tailed) | 0.000 | 0.798 | 0.000 | 0.356 | 0.000 | 0.289 | 0.000 | 0.223 | 0.000 | 0.526 | 0.000 |

** p<0.05.
